# Supplementary material
Source: publisher figshare collection journal article supplement (https://geolsoc.figshare.com/ndownloader/files/13303379)
Supplement: Supplementary file 1 [file 13303379]

## Sheet: Sheet2
Well	Depth below top Cenozoic (m TVD)	Formation	S1 (mg/g)	S2 (mg/g)	S3 (mg/g)	Tmax (°C)	PP (mg/g)	PI (wt ratio)	HI (mg HC/g TOC)	OI (mg CO2/g TOC)	N [%]	Ctotal [%]	S [%]	Corg [%]
C	20	UHy	0.26	12.1	1.3	445	12.36	0.02	469.241	50.4143	0.13	6.32	1.59	2.58
C	55	UHy	0.43	19.97	1.4	435	20.4	0.02	501.341	35.1466	0.17	6.68	4.95	3.98
C	135	UHy									0.13	6.55	1.63	2.73
C	213	UHy	0.22	10.06	0.97	433	10.28	0.02	410.693	39.5996	0.11	7.07	2.01	2.45
C	289	UHy									0.13	7.57	2.16	2.92
C	390	UHy	0.13	5.34	1.38	434	5.47	0.02	250.005	64.6079	0.11	7.41	1.96	2.14
C	450	UHy	0.29	19.36	0.89	432	19.65	0.01	515.781	23.711	0.2	5.56	2.81	3.75
C	508	UHy									0.14	5.94	2.45	2.99
C	532	LHy									0.09	8.8	0.76	2.49
C	570	LHy	0.35	14.98	0.83	422	15.33	0.02	476.809	26.4186	0.14	5.94	3.08	3.14
C	600	LHy	0.19	7.6	0.81	433	7.79	0.02	353.377	37.6625	0.12	4.95	2.55	2.15
C	620	LHy									0.19	6.34	3.23	3.93
C	675	LHy	0.3	8.15	1.02	422	8.45	0.04	305.554	38.2411	0.13	4.99	3.51	2.67
C	705	LHy	0.45	11.19	0.81	432	11.64	0.04	448.607	32.4729	0.12	5.37	3.73	2.49
C	740	LHy	0.09	1.78	0.66	424	1.87	0.05	172.186	63.8441	0.04	9.23	0.44	1.03
C	770	LHy									0.07	7.19	2.8	1.36
C	800	LHy									0.11	6.2	3	1.8
C	810	Cor	0.53	9.72	0.76	427	10.25	0.05	414.406	32.4021	0.11	6.43	3.35	2.35
C	825	Cor	0.24	2.94	0.79	424	3.18	0.08	234.67	63.0576	0.09	5.2	3.21	1.25
C	845	Cor									0.1	5.79	3.46	2.13
C	858	Cor									0.1	5.23	3.2	1.59
C	880	Cor									0.1	6.4	2.94	2.14
C	895	Cor									0.1	5.1	3.17	1.51
C	912	Cor	0.22	5.14	0.81	428	5.36	0.04	310.722	48.9659	0.1	5.23	3.23	1.65
C	930	Cor									0.09	6.03	2.24	1.28
C	975	Cer	0.12	2.89	0.84	437	3.01	0.04	278.348	80.9041	0.08	5.46	3.43	1.04
C	995	Cer	0.09	2.43	0.81	438	2.52	0.04	253.258	84.4192	0.09	4.91	1.99	0.96
C	1030	Cer									0.06	6.23	0.74	0.5
C	1195	CyM									0.06	4.06	0.24	0.46
C	1275	ME	0.05	0.31	0.63	433	0.36	0.14	66.9983	136.158	0.05	4.48	0.17	0.46
C	1130	ME									0.07	4.01	0.31	0.51
C	1360	RpC									0.07	4.18	0.17	0.52
C	1375	RpC									0.17	3.05	2.3	1.78
C	1385	RpC	0.29	6.07	0.67	437	6.36	0.05	256.56	28.3188	0.16	4.07	2.19	2.37
C	1395	RpC									0.15	4.52	2.62	2.83
C	1410	RpC	0.12	1.63	0.6	441	1.75	0.07	165.675	60.9847	0.1	2.27	0.79	0.98
C	1420	RpC	0.07	1.03	0.38	434	1.1	0.06	156.785	57.8429	0.08	3.33	0.86	0.66
C	1485	MPE	0.17	0.38	0.57	332	0.55	0.31	112.944	169.416	0.06	5.36	0.04	0.34
C	1495	MPE									0.04	4.76	0.28	0.43
C	1510	MPE									0.06	4.38	0.09	0.37
C	1550	LPE									0.13	3.29	0.33	0.67
C	1568	LPE									0.1	2.69	0.48	0.65
C	1570	LPE									0.15	3.12	0.34	0.97
C	1580	LPE	0.84	3.83	0.34	436	4.67	0.18	203.356	18.0525	0.08	2.11	0.38	1.88
C	1585	LPE	0.22	0.45	0.28	336	0.67	0.33	69.3983	43.1812
C	1590	LPE									0.04	0.74	0.14	0.65
C	1600	LPE	0.69	1.96	0.33	326	2.65	0.26	171.769	28.9202	0.09	1.15	0.14	1.14
